# Supplementary material for: The UK Pregnancies Better Eating and Activity Trial (UPBEAT); Pregnancy Outcomes and Health Behaviours by Obesity Class
Source: MDPI journal article supplement (doi:10.3390/ijerph17134712), 2020-06-30
Supplement: s1 [file s1]

**Table S1.** Health behaviours of pregnant women with obesity by obesity class at study entry.

| Dietary intake at study entry <sup>a</sup> | Obesity Class                |                                |                                | <i>p</i> <sup>b</sup> |
|--------------------------------------------|------------------------------|--------------------------------|--------------------------------|-----------------------|
|                                            | Class I<br>( <i>n</i> = 564) | Class II<br>( <i>n</i> =380)   | Class III<br>( <i>n</i> = 200) |                       |
| Total energy<br>(Kcal)                     | 1852.31 ± 603.32             | 1824.73 ± 592.40               | 1831.17 ± 631.97               | 0.772                 |
| Glycaemic index<br>(0-100)                 | 56.83 ± 4.15                 | 56.70 ± 4.07                   | 57.03 ± 3.48                   | 0.647                 |
| Glycaemic load<br>(per day)                | 140.31 ± 55.35               | 135.37 ± 50.93                 | 134.96 ± 53.27                 | 0.276                 |
| Carbohydrate<br>(% energy)                 | 49.66 ± 7.53                 | 49.00 ± 7.29                   | 48.48 ±7.21                    | 0.117                 |
| Protein<br>(% energy)                      | 19.63 ± 4.36                 | 20.08 ± 4.45                   | 20.36 ± 4.57                   | 0.091                 |
| Total fat<br>(% energy)                    | 30.86 ± 5.43                 | 31.07 ± 5.38                   | 31.36 ± 5.43                   | 0.517                 |
| Saturated fat<br>(% energy)                | 12.55 ± 3.03                 | 12.63 ± 2.85                   | 12.65 ± 2.94                   | 0.880                 |
| Fibre<br>(g/day)                           | 13.53 ± 5.72                 | 13.37 ± 5.78                   | 12.87 ± 5.27                   | 0.371                 |
| Physical activity at baseline              | 30–34.9<br>( <i>n</i> = 667) | 35.0–39.9<br>( <i>n</i> = 435) | ≥40.0<br>( <i>n</i> = 241)     |                       |
| Walking<br>(minutes/week)                  | 280 ± 490                    | 315 ± 480                      | 280 ± 720                      | 0.349                 |
| MET <sup>c</sup><br>(minutes/week)         | 1386 ± 2715                  | 1485 ± 3261                    | 1320 ± 3655.5                  | 0.405                 |

Nutritional data are mean ± SD, physical activity data are median ± IQR <sup>a</sup> Study entry data collected at 15<sup>+0</sup>–18<sup>+6</sup> weeks' gestation, <sup>b</sup> *p*: differences between nutritional variables and the log transformation of physical activity measures by obesity class, assessed using ANOVA. *p* < 0.05 taken as significant <sup>c</sup> MET = metabolic equivalent of task, is defined as the energy expenditure ratio of activity to rest
